# Supplementary material
Source: publisher figshare collection journal article supplement (https://gsajournals.figshare.com/ndownloader/files/21216540)
Supplement: Supplementary file 1 [file 21216540]

**Figure S1.** Phylogenetic tree of TIR domains of the Toll receptor homologs from Figure 2 with bootstrap supports on branches. Tree was built using the LG+G model with 1000 bootstrap iterations and midpoint-rooted. Branch colors represent different phyla. Scale bar = number of nucleotide substitution/site

**Figure S2.** Phylogenetic tree of Rel homology domain (RHD)-containing proteins from Figure 4 with bootstrap supports on branches. The tree was built using the VT+G+I model with 1000 bootstrap iterations and midpoint rooted. Branch color represents different phyla. Scale bar = number of nucleotide substitution/site

**Table S1.** Trinity assembly statistics of transcriptome reads obtained in this study.

|  | | ***Echiniscoides* cf. *sigismundi*** | | ***Echiniscus testudo*** | ***Mesobiotus philippinicus*** | ***Richtersius***  **cf. *coronifer*** | ***Epiperipatus* sp.** | ***Opisthopatus kwazululandi*** | ***Paragordius varius*** |
| --- | --- | --- | --- | --- | --- | --- | --- | --- | --- |
| Total trinity 'genes' | | 80888 | | 114330 | 32898 | 107677 | 196417 | 310715 | 82519 |
| Total trinity transcripts | | 112947 | | 187320 | 43173 | 142537 | 266764 | 359500 | 136971 |
| Percent GC | | 31.17 | | 45.98 | 40.43 | 46.22 | 29.6 | 32.73 | 37.22 |
|  |  | | *Based on ALL transcript contigs* | | | | | | |
| Contig N50 | | 986 | | 736 | 1565 | 1998 | 436 | 392 | 917 |
| Median contig length | | 388 | | 334 | 903 | 590 | 271 | 278 | 396 |
| Average contig | | 655.97 | | 547.39 | 1108.08 | 1102.27 | 420.44 | 396.19 | 644.58 |
| Total assembled bases | | 74089292 | | 102537281 | 47839061 | 157114812 | 112163829 | 142429071 | 88288874 |
|  |  | | *Based on ONLY LONGEST ISOFORM per gene* | | | | | | |
| Contig N50 | | 1046 | | 480 | 1476 | 1438 | 343 | 336 | 846 |
| Median contig length | | 374 | | 277 | 814 | 413 | 262 | 268 | 333 |
| Average contig | | 661.79 | | 447.53 | 1024.77 | 804.54 | 366.08 | 354.79 | 586.13 |
| Total assembled bases | | 53530490 | | 51166210 | 33713025 | 86629962 | 71903537 | 110239141 | 48366628 |

**Table S2.** Database, ID number, and number (N) of arthropod orthologs of *Drosophila melanogaster* and nematode orthologs of *Caenorhabditis elegans* immune pathway genes used for HMMER profile building.

| **Gene** | **Database** | **ID Number** | **N** |
| --- | --- | --- | --- |
| **Toll Pathway** | | |  |
| GBNP | ImmunoDB | EOG9WSWH2 | 79 |
| PGRP-SA | OrthoDB | EOG090X0F4M | 358 |
| PGRP-SD | OrthoDB | EOG090X0F4M | 358 |
| Spätzle | OrthoDB | EOG090X0G35 | 230 |
| Toll (dmToll1 only) | ImmunoDB | EOG96Q70J | 56 |
| Mydd | ImmunoDB | EOG9HQDRB | 25 |
| Tube | ImmunoDB | EOG93FH4T | 22 |
| Pelle | ImmunoDB | EOG932150 | 24 |
| Cactus | ImmunoDB | EOG93R3TX | 32 |
| Dif/Dorsal | OrthoDB | EOG090X053D | 241 |
| **Imd Pathway** | | |  |
| PGRP-LC | OrthoDB | EOG090X0997 | 338 |
| PGRP-LB | OrthoDB | EOG090X0F4M | 358 |
| Imd | ImmunoDB | EOG9N5W3D | 19 |
| Fadd | OrthoDB | EOG090X0ARJ | 109 |
| Dredd | OrthoDB | EOG090X03XG | 98 |
| Tak1 | ImmunoDB | EOG92NJ5Z | 22 |
| Key | ImmunoDB | EOG944KRN | 28 |
| Ird5 | ImmunoDB | EOG90K857 | 26 |
| Relish | OrthoDB | EOG090X03RC | 161 |
| **JNK Pathway** | | |  |
| Hemipterous | OrthoDB | EOG090X06G9 | 393 |
| Basket (JNK) | OrthoDB | EOG090X065R | 148 |
| AF-1 (JRA/Jun) | OrthoDB | EOG090X0F3W | 145 |
| Fos (Kayak) | OrthoDB | EOG090X09Y7 | 136 |
| **TIR-1 Pathway** | | |  |
| TIR-1 | OrthoDB | EOG091H00QE | 10 |
| NSY-1 | OrthoDB | EOG091H006V | 13 |
| SEK-1 | OrthoDB | EOG091H0464 | 10 |
| PMK-1 | OrthoDB | EOG091H03YW | 12 |
| ATF-7 | OrthoDB | EOG091H048X | 9 |

| **Gene** | **Isoform** | **ID Number** |
| --- | --- | --- |
| **Toll Pathway** | | |
| GNBP1 | PA | FBpp0074817 |
| GNBP3 | PA | FBpp0076237 |
| PGRP-SA | PA | FBpp0073358 |
| PGRP-SD | PA | FBpp0076519 |
| Spätzle | PA | FBpp0084507 |
| Spätzle2 (NT1) | PF | FBpp0290823 |
| Spätzle3 | PA | FBpp0079183 |
| Spätzle4 | PB | FBpp0293785 |
| Spätzle5 | PA | FBpp0072881 |
| Spätzle6 | PA | FBpp0072277 |
| Toll | PC | FBpp0303187 |
| Toll2 (18w) | PA | FBpp0085620 |
| Toll3 (MstProx) | PA | FBpp0081104 |
| Toll4 | PA | FBpp0079369 |
| Toll5 (Tehao) | PA | FBpp0080080 |
| Toll6 | PB | FBpp0297410 |
| Toll7 | PA | FBpp0085638 |
| Toll8 (Tollo) | PA | FBpp0075360 |
| Toll9 | PC | FBpp0300871 |
| Mydd | PC | FBpp0311274 |
| Tube | PC | FBpp0291542 |
| Pelle | PB | FBpp0306780 |
| Cactus | PE | FBpp0308004 |
| Dif | PC | FBpp0290792 |
| Dorsal | PC | FBpp0080560 |
| **Imd Pathway** | | |
| PGRP-LC | PH | FBpp0300668 |
| PGRP-LB | PA | FBpp0297234 |
| PGRP-Sc1a | PB | FBpp0087786 |
| PGRP-Sc1b | PA | FBpp0308436 |
| PGRP-Sc2 | PD | FBpp0087788 |
| Imd | PA | FBpp0085904 |
| Fadd | PA | FBpp0083574 |
| Dredd | PE | FBpp0113052 |
| Tak1 | PA | FBpp0077011 |
| Key | PB | FBpp0296952 |
| Ird5 | PB | FBpp0293344 |
| Relish | PB | FBpp0088973 |
| **JNK Pathway** | | |
| Hemipterous | PA | FBpp0073578 |
| Jnk (Basket) | PF | FBpp0291573 |
| Jra (Jun/Af-1) | PC | FBpp0303456 |
| Fos (Kayak) | PF | FBpp0288515 |
| **TIR-1 Pathway** | | |
| TIR-1 | F | CE50709 |
| NSY-1 | A | CE44901 |
| SEK-1 | - | CE31210 |
| PMK-1 | - | CE06686 |
| ATF-7 | C | CE33598 |

**Table S3.** Longest isoforms and ID number of *Drosophila melanogaster* (Flybase) and *Caenorhabditis elegans* (Wormbase) immune pathway genes used as query for the 1st Blastp search (2nd step)

**Table S4.** Domain identifiers used for checking domains of *Drosophila melanogaster* and *Caenorhabditis elegans* immune pathway gene homologs of tardigrades and other ecdysozoans.

| **Gene** | **Domain** | **Identifier** | |
| --- | --- | --- | --- |
| **Toll Pathway** | | |
| GNBP | CBM39 | pfam15886 | |
|  | LamG (GH16_beta_GRP) | cd02179 | |
| Spätzle | Spaetzle | pfam16077 | |
| Toll | TIR_2 | smart00255 | |
| LRR_CT | smart00082 | |
| LRR_NT | smart00013 | |
| LRR_8/LRR | pfam13855 | |
| PLN00113 | PLN00113 | |
| Mydd | TIR_2 | smart00255 (NS) | |
|  | Death_myd88 | cd08312 (NS) | |
| Tube | Death_2 | pfam14786 | |
| Pelle | Death_pelle | cd08307 | |
|  | STKc_IRAK | cd14066 | |
| Cactus | ANK | cd00204/cl02529 | |
| Dif/Dorsal | RHD-n | cl08275 | |
|  | IPT | cl15674 | |
| **Imd Pathway** | | |
| Extracellular and Transmembrane PGRP | PGRP | smart00701 | |
| Imd | Death | cd01670 | |
| Fadd | Death | cd01670 | |
|  | DED_FADD | cd08336 (NS) | |
| Dredd | CASc | cd00032 | |
| Tak1 | STKc_TAK1 | cd14058 (Pkin-pfam07714) | |
| Key | UBAN | cd09803 | |
|  | SMC_N | TIGR02168 (NS) | |
| Ird5 | PKC (STKc_IKK) | cd13989 (NS) | |
|  | S_TKc | smart00220 | |
| Relish | RHD-n | cl08275 | |
|  | IPT | cl15674 | |
|  | ANK | cd00204/cl02529 | |
| **JNK Pathway** | | |
| Hemipterous | PKc_MKK7 | cd06618 | |
| Basket (JNK) | STKc_JNK | cd07850 | |
| AF-1 (JRA/Jun) | bZIP_Jun | cd14696 | |
|  | Jun | pfam03957 | |
| Fos (Kayak) | bZIP_Fos | cd14721 | |
| **TIR-1 Pathway** | | |
| TIR-1 | SAM_SARM1-like repeat1 | cd09501 | |
|  | SAM_SARM1-like repeat2 | cd09502 | |
|  | TIR_2 | smart00255 | |
| NSY-1 | Duf4071 | pfam13281 | |
|  | STKc_ASK (Pkc-like) | cd06624 | |
| SEK-1 | PKc_MKK3_6 | cd06617 | |
| PMK-1 | STKc_p38 | cd07851 | |
| ATF-7 | BRLZ (bZIP) | smart00338, cd14687 | |

**Table S5.** List of animals used for the construction of the REL phylogenetic tree and the database and ID where the NFκB and NFAT homologs were obtained. I – ImmunoDB; O – OrthoDB.

| **Animal Group** | **Organism** | **NFκB homologs** | **NFAT homologs** |
| --- | --- | --- | --- |
| Porifera | *Amphimedon queenslandica* | EOG091G03PF (O) | EOG091G01QP (O) |
| Cnidaria | *Nematostella vectensis* | EOG091G03PF (O) | EOG091G01QP (O) |
| Arthropoda | *Aedes aegypti* | EOG908NFH (I); EOG9M0F7F (I) | EOG090X014K (O) |
|  | *Culex quinquefasciatus* | EOG908NFH (I); EOG9M0F7F (I) | EOG090X014K (O) |
|  | *Drosophila ananassae* | EOG908NFH (I); EOG9M0F7F (I) | EOG090X014K (O) |
|  | *Drosophila erecta* | EOG908NFH (I); EOG9M0F7F (I) | EOG090X014K (O) |
|  | *Drosophila grimshawi* | EOG908NFH (I); EOG9M0F7F (I) | EOG090X014K (O) |
|  | *Drosophila melanogaster* | EOG908NFH (I); EOG9M0F7F (I) | EOG090X014K (O) |
|  | *Drosophila mojavensis* | EOG908NFH (I); EOG9M0F7F (I) | EOG090X014K (O) |
|  | *Drosophila persimilis* | EOG908NFH (I); EOG9M0F7F (I) | EOG090X014K (O) |
|  | *Drosophila pseudoobscura* | EOG908NFH (I); EOG9M0F7F (I) | EOG090X014K (O) |
|  | *Drosophila sechellia* | EOG908NFH (I); EOG9M0F7F (I) | EOG090X014K (O) |
|  | *Drosophila simulans* | EOG908NFH (I); EOG9M0F7F (I) |  |
|  | *Drosophila suzukii* |  | EOG090X014K (O) |
|  | *Drosophila virilis* | EOG908NFH (I); EOG9M0F7F (I) | EOG090X014K (O) |
|  | *Drosophila willistoni* | EOG908NFH (I); EOG9M0F7F (I) | EOG090X014K (O) |
|  | *Drosophila yakuba* | EOG908NFH (I); EOG9M0F7F (I) | EOG090X014K (O) |
|  | *Musca domestica* |  | EOG090X014K (O) |
|  | *Nasonia vitripennis* | EOG908NFH (I); EOG9M0F7F (I) | EOG090X014K (O) |
|  | *Bombyx mori* | EOG908NFH (I); | EOG090X014K (O) |
|  | *Pediculus humanus* | EOG908NFH (I); EOG9M0F7F (I) | EOG090X014K (O) |
|  | *Ixodes scapularis* | EOG908NFH (I); EOG9M0F7F (I) | EOG090X014K (O) |
|  | *Daphnia pulex* | EOG908NFH (I); EOG9M0F7F (I) | EOG090X014K (O) |
|  | *Strigamia maritima* |  | EOG090X014K (O) |
|  | *Acyrthosiphon pisum* | EOG908NFH (I) |  |
|  | *Apis mellifera* | EOG908NFH (I); EOG9M0F7F (I) |  |
|  | *Tribolium castaneum* | EOG908NFH (I); EOG9M0F7F (I) |  |
|  | *Anopheles gambiae* | EOG908NFH (I); EOG9M0F7F (I) |  |
| Mollusca | *Crassostrea gigas* | EOG091G07RW (O); EOG091G03PF (O) | EOG091G01QP (O) |
|  | *Lottia gigantea* | EOG091G07RW (O); EOG091G03PF (O) | EOG091G01QP (O) |
|  | *Biomphalaria glabrata* | EOG091G07RW (O); EOG091G03PF (O) |  |
| Annelida | *Capitella teleta* | EOG091G07RW (O); EOG091G03PF (O) | EOG091G01QP (O) |
|  | *Helobdella robusta* | EOG091G07RW (O); EOG091G03PF (O) | EOG091G01QP (O) |
| Echinodermata | *Strongylocentrotus purpuratus* | EOG091G07RW (O); EOG091G03PF (O) | EOG091G01QP (O) |
| Chordata | *Homo sapiens* | EOG091G08JD (O); EOG091G03PF (O) | EOG091G01QP (O) |

**Table S6.** Number of *Drosophila melanogaster* and *Caenorhabditis* *elegans* antimicrobial pathway gene homologs detected in tardigrades and other ecdysozoans.

|  | **Pathway** | **Gene** | **ONYCHOPHORA** | | **TARDIGRADA** | | | | | | | | **NEMATOMORPHA** | | **PRIAPULIDA** | |
| --- | --- | --- | --- | --- | --- | --- | --- | --- | --- | --- | --- | --- | --- | --- | --- | --- |
|  | ***Epiperipatus***  **sp.** | ***Opisthopatus***  ***kwazululandi*** | ***Paramacrobiotus richtersi*** | ***Mesobiotus philippinicus*** | ***Richtersius***  **cf. *coronifer*** | ***Hypsibius exemplaris*** | ***Ramazzottius varieornatus*** | ***Milnesium tardigradum*** | ***Echiniscus testudo*** | ***Echiniscoides* cf. *sigismundi*** | | ***Paragordius***  ***varius*** | | ***Priaupulus caudatus*** |
| ***Drosophila melanogaster*** | **TLR** | Spatzle | 7 | 5 | 2 | 2 | 3 | 2 | 1 | 2 | 2 | 4 | | 0 | | 0 |
|  | TLR | 11 (LRR-only),  3 (complete) | 8 (LRR-only),  1 (TIR-only) | 3 (LRR-only),  1 (complete) | 1 (LRR-only),  1 (TIR-only) | 3 (LRR-only),  1 (complete) | 3 (LRR-only),  1 (complete) | 2 (LRR-only),  1 (complete) | 1 (LRR-only),  1 (complete) | 2 (LRR-only),  1 (TIR-only) | 3 (LRR-only),  1 (complete) | | 2 (LRR-only),  1 (complete) | | 3 (LRR-only),  1 (complete) |
|  | Myd88 | 1 | 1 | 0 | 0 | 0 | 0 | 0 | 0 | 0 | 0 | | 0 | | 0 |
|  | Pelle | 1 | 1 | 0 | 0 | 0 | 0 | 0 | 0 | 0 | 0 | | 0 | | 1 |
|  | Tube | 0 | 0 | 0 | 0 | 0 | 0 | 0 | 0 | 0 | 0 | | 0 | | 0 |
|  | Cactus | 3 | 2 | 0 | 0 | 0 | 0 | 0 | 0 | 0 | 0 | | 0 | | 0 |
|  | Dif/Dorsal | 1 | 1 | 0 | 0 | 0 | 0 | 0 | 0 | 0 | 0 | | 0 | | 1 |
| **IMD** | PGRP | 1 | 0 | 1 | 1 | 0 | 1 | 2 | 0 | 0 | 0 | | 0 | | 0 |
|  | IMD | 0 | 0 | 0 | 0 | 0 | 0 | 0 | 0 | 0 | 0 | | 0 | | 0 |
|  | FADD | 0 | 0 | 0 | 0 | 0 | 0 | 0 | 0 | 0 | 0 | | 0 | | 0 |
|  | Dredd | 0 | 0 | 0 | 0 | 0 | 0 | 0 | 0 | 0 | 0 | | 0 | | 0 |
|  | Tak1 | 1 | 1 | 1 | 1 | 1 | 1 | 1 | 0 | 1 | 1 | | 2 | | 0 |
|  | Key | 0 | 0 | 0 | 0 | 0 | 0 | 0 | 0 | 0 | 0 | | 0 | | 0 |
|  | Ird5 | 1 | 1 | 0 | 0 | 0 | 0 | 0 | 0 | 0 | 0 | | 0 | | 1 |
|  | Relish | 1 | 0 | 0 | 0 | 0 | 0 | 0 | 0 | 0 | 0 | | 1 | | 0 |
| **JNK** | Hemipterous | 1 | 1 | 1 | 1 | 1 | 1 | 1 | 1 | 1 | 1 | | 0 | | 1 |
|  | Jnk (Basket) | 2 | 1 | 1 | 1 | 1 | 1 | 1 | 1 | 1 | 1 | | 1 | | 1 |
|  | Jra (Jun) | 2 | 1 | 1 | 1 | 2 | 1 | 2 | 1 | 0 | 0 | | 1 | | 2 |
|  |  | Fos (Kayak) | 1 | 1 | 1 | 1 | 1 | 1 | 1 | 1 | 0 | 0 | | 0 | | 1 |
| ***Caenorhabditis***  ***elegans*** | **TIR-1** | Tir1 | 1 | 1 | 1 | 1 | 1 | 1 | 1 | 0 | 1 | 1 | | 0 | | 1 |
|  | Nsy1 | 0 | 1 | 1 | 1 | 2 | 1 | 1 | 0 | 1 | 1 | | 0 | | 1 |
|  | Sek1 | 2 | 1 | 3 | 3 | 1 | 2 | 1 | 1 | 1 | 1 | | 3 | | 1 |
|  | Pmk1 | 1 | 2 | 3 | 2 | 1 | 1 | 1 | 1 | 1 | 1 | | 1 | | 1 |
|  | Atf7 | 0 | 0 | 0 | 0 | 0 | 0 | 0 | 0 | 0 | 0 | | 0 | | 0 |
